# Supplementary material
Source: Springer Nature journal article supplement (https://www.springermedizin.de/resource/supplementary/12960_2008_137_MOESM1_ESM.pdf/9570490)

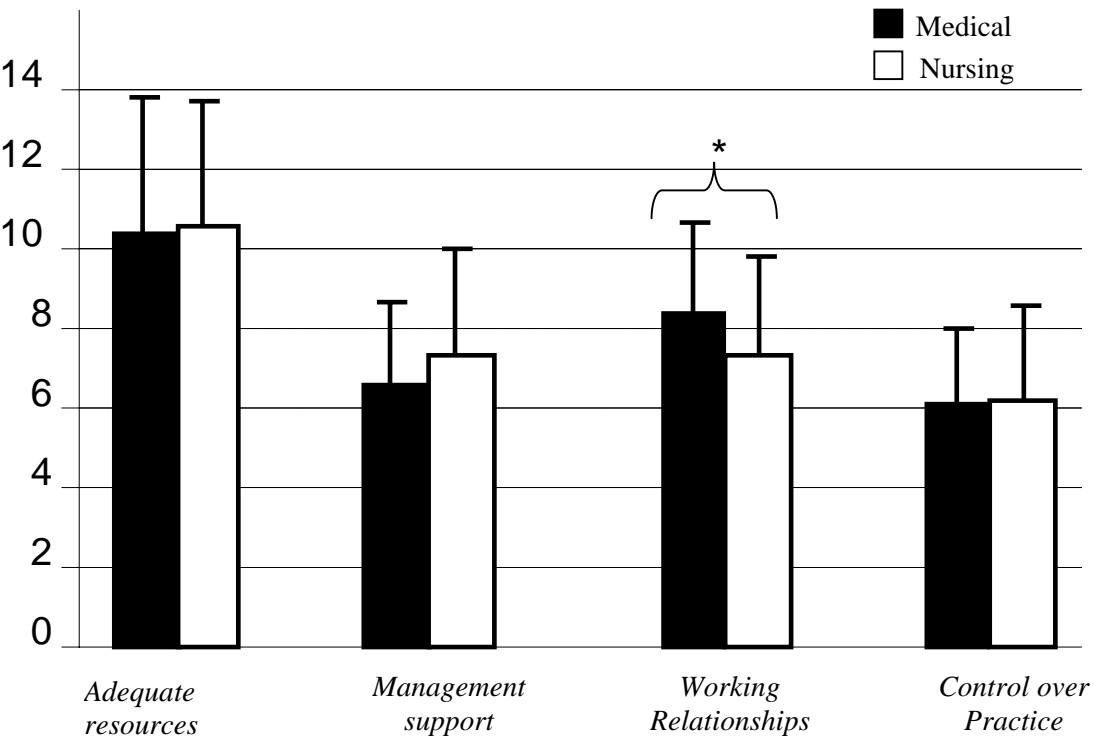

\*  $p < .05$

Supplement: MOESM1 [file 9570490]
